# Supplementary material
Source: MDPI journal article supplement (https://www.mdpi.com/2079-6412/12/6/795)
Supplement: s1 [file s1]

# Supplementary Materials: Facile Fabrication of F-doped SnO<sub>2</sub> Nanomaterials for Improved Photocatalytic Activity

Linfeng Xiao <sup>1</sup>, Runhua Liao <sup>1,\*</sup>, Shu Yang <sup>1</sup>, Yang Qiu <sup>1</sup>, Meng Wang <sup>1</sup>, Zheng Zhang <sup>1</sup>, Jie Du <sup>1</sup> and Zhixiang Xie <sup>2,\*</sup>

<sup>1</sup> School of Materials Science and Engineering, Jingdezhen Ceramic University, Jingdezhen 333403, China; 2020022003@stu.jcu.edu.cn (L.X.); 20192207051@stu.kust.edu.cn (S.Y.); 119010200118@stu.jcu.edu.cn (Y.Q.); 119010200210@stu.jcu.edu.cn (M.W.); 119010200214@stu.jcu.edu.cn (Z.Z.); 005315@jcu.edu.cn (J.D.)

<sup>2</sup> School of Chemistry, Biology Engineering, Suzhou University of Science and Technology, Suzhou 215009, China

\* Correspondence: 001072@jcu.edu.cn (R.L.); xiezhixiang@usts.edu.cn (Z.X.)

**Citation:** Xiao, L.; Liao, R.; Yang, S.; Qiu, Y.; Wang, M.; Zhang, Z.; Du, J.; Xie, Z. Facile Fabrication of F-doped SnO<sub>2</sub> Nanomaterials for Improved Photocatalytic Activity. *Coatings* **2022**, *12*, 795. <https://doi.org/10.3390/coatings12060795>

Academic Editor: Alexandru Enesca

Received: 28 April 2022

Accepted: 5 June 2022

Published: 8 June 2022

**Publisher's Note:** MDPI stays neutral with regard to jurisdictional claims in published maps and institutional affiliations.

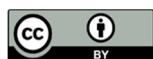

**Copyright:** © 2022 by the authors. Licensee MDPI, Basel, Switzerland. This article is an open access article distributed under the terms and conditions of the Creative Commons Attribution (CC BY) license (<https://creativecommons.org/licenses/by/4.0/>).

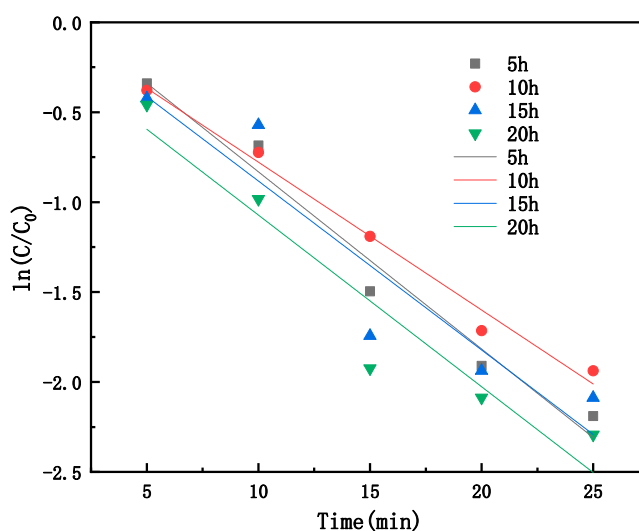

(a)

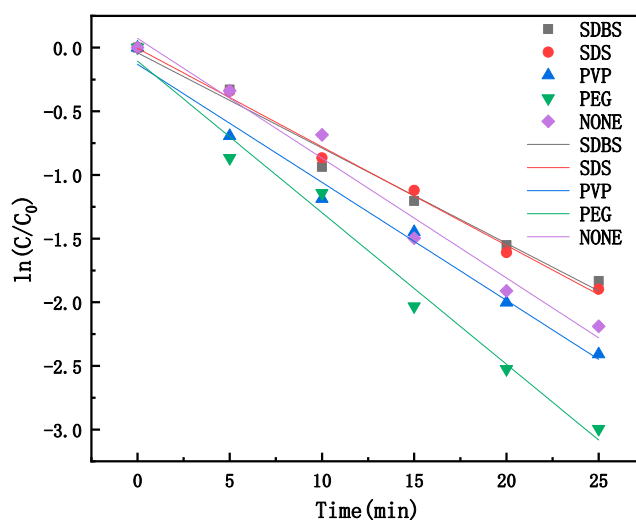

(b)

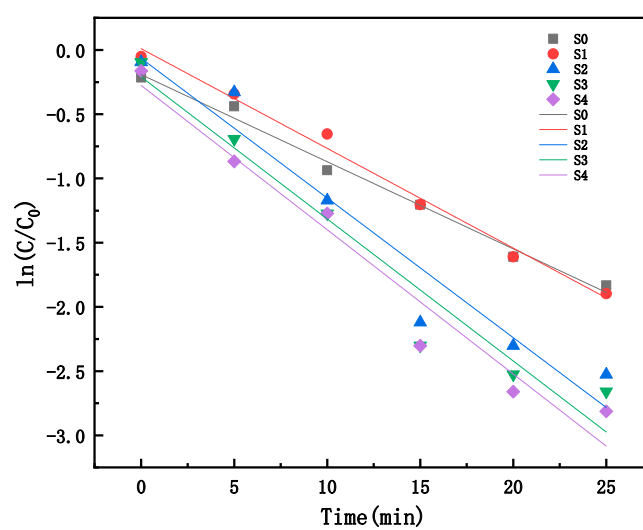

(c)

**Figure S1.** pseudo-first-order kinetics of Rh B, (a) different solvothermal time (h); (b) different surfactants; (c) F/Sn.

**Table S1.** First-order kinetics fitting Equation and correlation coefficient ( $R^2$ ) for Different Solvothermal times.

| Different Solvothermal Time (h) | Equation                  | The Correlation Coefficient ( $R^2$ ) |
|---------------------------------|---------------------------|---------------------------------------|
| 5                               | $y = -0.09849x + 0.1532$  | 0.96041                               |
| 10                              | $y = -0.08221x + 0.04404$ | 0.98316                               |
| 15                              | $y = -0.09391x + 0.05623$ | 0.83797                               |
| 20                              | $y = -0.09543x - 0.11787$ | 0.88489                               |

**Table S2.** First-order kinetics fitting Equation and correlation coefficient ( $R^2$ ) for different surfactants.

| Surfactants | Equation                  | The Correlation Coefficient ( $R^2$ ) |
|-------------|---------------------------|---------------------------------------|
| SDBS        | $y = -0.07482x - 0.04038$ | 0.98055                               |
| SDS         | $y = -0.07738x - 0.00521$ | 0.99196                               |
| PVP         | $y = -0.09273x - 0.13069$ | 0.98329                               |
| PEG         | $y = -0.1191x - 0.1052$   | 0.98186                               |
| NONE        | $y = -0.09411x + 0.07295$ | 0.97305                               |

**Table S3.** First-order kinetics fitting Equation and correlation coefficient ( $R^2$ ) for different F/Sn ratio.

| F/Sn | Equation                  | The Correlation Coefficient ( $R^2$ ) |
|------|---------------------------|---------------------------------------|
| S0   | $y = -0.06783x - 0.19131$ | 0.98756                               |
| S1   | $y = -0.0776x + 0.01029$  | 0.98792                               |
| S2   | $y = -0.10873x - 0.06459$ | 0.92503                               |
| S3   | $y = -0.11058x - 0.20904$ | 0.92975                               |
| S4   | $y = -0.11234x - 0.27547$ | 0.94825                               |

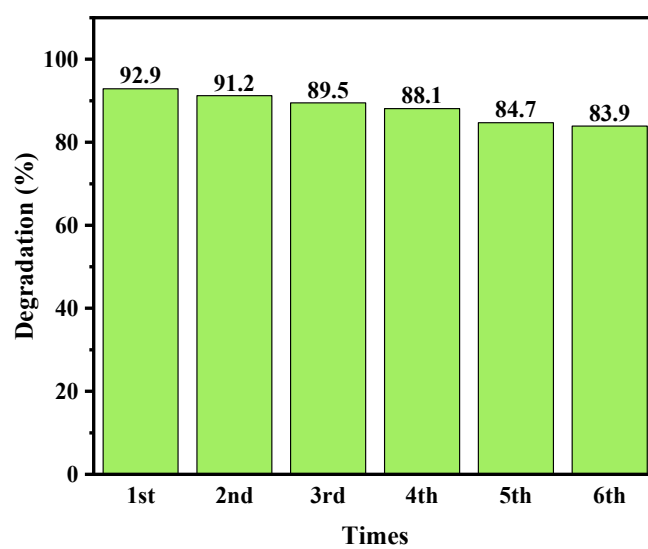

Figure S2. The reusability of the S4.
